# Supplementary material for: Deltamethrin-Evoked ER Stress Promotes Neuroinflammation in the Adult Mouse Hippocampus
Source: MDPI journal article supplement (doi:10.3390/cells11121961), 2022-06-18
Supplement: s1 [file s1]

**A**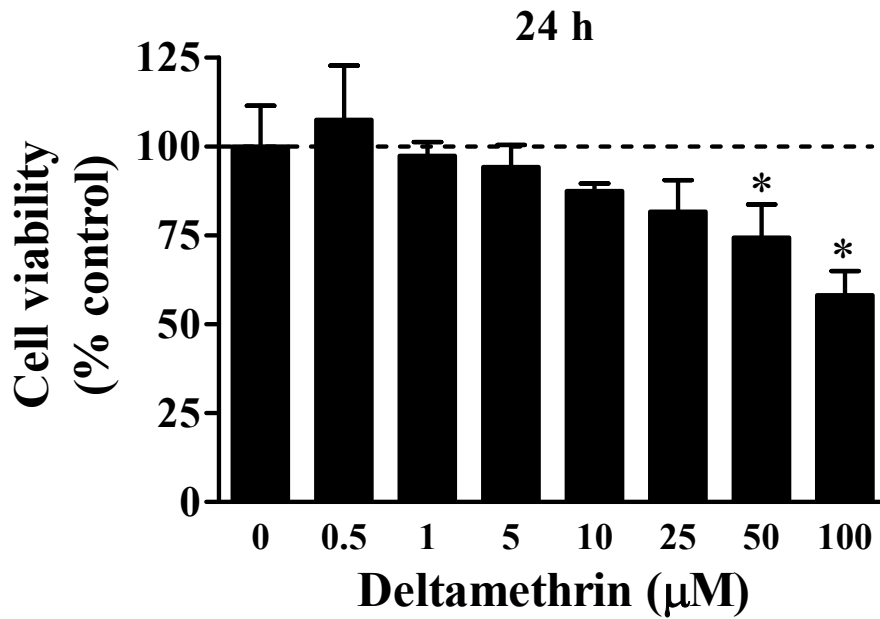**B**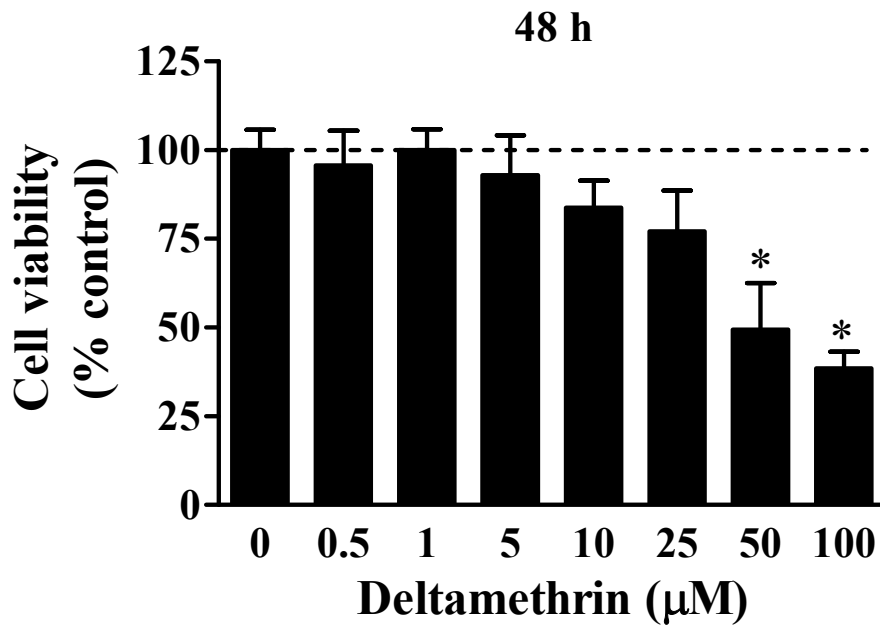

**Supplementary Figure S1.** Cytotoxic effect of deltamethrin on MMCs. Cells were treated with several concentrations of deltamethrin for 24 h (A) and 48 h (B). At the end of treatment, cell viability was evaluated using the AlamarBlue® cell viability reagent (Invitrogen, Grand Island, New York). Data represent mean  $\pm$  SEM from 3 independent experiments, each of which was performed in triplicate. Asterisk denotes significant difference from control ( $p < 0.05$ ).
